# Supplementary material
Source: publisher figshare collection journal article supplement (https://sage.figshare.com/ndownloader/files/22660508)
Supplement: Supplementary file 1 [file 22660508]

## **Supplemental material for**

### **“How short is too short? – A Randomised Controlled Trial evaluating short-term Existential Behavioural Therapy for Informal Caregivers of Palliative Patients”**

Martina B. Kühnel, Linda Marchioro, Veronika Deffner, Claudia Bausewein, Hildegard Seidl, Sarah Siebert, Martin Fegg

## **Appendix A: Time of death of patients**

Table 4

## **Appendix B: Results of regression analyses for secondary outcomes**

Tables 5 - 14

## **Appendix C: Results of sensitivity analyses regarding missing data**

Tables 15 - 25

## Appendix A: Time of death of patients

Table 4: Time of death of patients during caregivers' participation in the study.

| Time of death of the patient | RCT           |               | Decliners     |
|------------------------------|---------------|---------------|---------------|
|                              | sEBT          | Control       |               |
| At t1                        | <i>n</i> = 75 | <i>n</i> = 82 | <i>n</i> = 50 |
| Unknown                      | 3 (4.0%)      | 10 (12.2%)    | 7 (14.0%)     |
| Alive                        | 66 (88.0%)    | 67 (81.7%)    | 37 (74.0%)    |
| Died ≤ 3 months ago          | 6 (8.0%)      | 5 (6.1%)      | 5 (10.0%)     |
| Died ≥ 3 months ago          | - -           | - -           | 1 (2.0%)      |
| At t2                        | <i>n</i> = 60 | <i>n</i> = 67 |               |
| Unknown                      | 2 (3.3%)      | 7 (10.4%)     |               |
| Alive                        | 31 (51.7%)    | 32 (47.8%)    |               |
| Died ≤ 3 months ago          | 27 (45.0%)    | 28 (41.8%)    |               |
| At t3                        | <i>n</i> = 58 | <i>n</i> = 64 | <i>n</i> = 43 |
| Unknown                      | 1 (1.7.0%)    | 5 (7.8%)      | 11 (22.0%)    |
| Alive                        | 12 (20.7%)    | 9 (14.1%)     | 8 (16.0%)     |
| Died ≤ 3 months ago          | 43 (74.1%)    | 47 (73.4%)    | 29 (58.0%)    |
| Died ≥ 3 months ago          | 2 (3.4%)      | 3 (4.7%)      | 2 (4.0%)      |
| At t4                        | <i>n</i> = 54 | <i>n</i> = 64 | <i>n</i> = 38 |
| Unknown                      | 1 (1.9%)      | 6 (9.4%)      | 16 (32.0%)    |
| Alive                        | 4 (7.4%)      | 4 (6.3%)      | 2 (4.0%)      |
| Died ≤ 3 months ago          | 3 (5.6%)      | 1 (1.6%)      | 1 (2.0%)      |
| Died ≥ 3 months ago          | 46 (85.2%)    | 53 (82.8%)    | 31 (62.0%)    |

Note: Data are number (%)

No data for decliners at t2

## Appendix B: Results of regression analyses for secondary outcomes

| Variable <sup>a</sup>                 | Category <sup>b</sup> | Model 1<br>n= 126 |                 | Model 2<br>n= 114 |                 | Model 3<br>n= 104 |                 |
|---------------------------------------|-----------------------|-------------------|-----------------|-------------------|-----------------|-------------------|-----------------|
|                                       |                       | beta              | p-Value         | beta              | p-Value         | beta              | p-Value         |
| Gender                                | Male                  | -.783             | .184            | -.573             | .374            | -.824             | .208            |
| Relationship with patient             | Partner/child         | .015              | .981            | .078              | .912            | -.245             | .732            |
| Employment                            | Retired/other         | .125              | .888            | .407              | .672            | 1.27              | .207            |
| Support apart from study              | Unknown               | 1.74              | .295            | 1.85              | .285            | 2.73              | .136            |
|                                       | Support               | .380              | .617            | .418              | .607            | .847              | .334            |
| Group                                 | sEBT intervention     | -.318             | .569            | -.580             | .346            | -.914             | .162            |
| <b>Time of investigation</b>          | t3                    | -1.21             | <b>.003</b>     | -1.23             | <b>.006</b>     | -1.40             | <b>.002</b>     |
|                                       | t4                    | -1.67             | <b>.022</b>     | -1.76             | <b>.026</b>     | -2.25             | <b>.005</b>     |
| <b><i>Patient's time of death</i></b> | Unknown               | .982              | .473            | .488              | .717            | .362              | .784            |
|                                       | Alive                 | .011              | .983            | .105              | .856            | -.447             | .453            |
|                                       | Deceased >3 months    | -1.55             | <b>.030</b>     | -1.58             | <b>.040</b>     | -1.27             | .103            |
| Age                                   |                       | -.006             | .859            | -.015             | .664            | -.039             | .278            |
| Psychologist                          | Psychologist 1        | -.109             | .895            | -.067             | .939            | -.356             | .687            |
|                                       | Psychologist 2        | -.504             | .517            | -.583             | .484            | -.393             | .650            |
| <b>Anxiety at t1</b>                  |                       | .565              | <b>&lt;.001</b> | .553              | <b>&lt;.001</b> | .502              | <b>&lt;.001</b> |

Table 5: Estimated regression coefficients beta and p-values for the independent variables in general linear mixed models with the secondary outcome variable post-treatment **anxiety**. Main model: participants of at least the first two investigations (model 1); both sensitivity analyses include participants of at least the first two investigations, model 2 without participants (sEBT and control group) with only one session, model 3 without participants of the sEBT group who did not practise.

<sup>a</sup> Variables are in bold or bold italics depending on the significance of the F-test for the whole variable. Bold: significant at p-value<0.05. Bold italics: p-value between 0.05 and 0.10 (trend).

<sup>b</sup> Reference categories: Gender – Female; Relationship with Patient – Other; Employment – Employment/Student; Support apart from study – No support; Group – Control; Time of investigation – t2; Patient deceased – Deceased ≤ 3 months; Psychologist – Psychologist 3.

| Variable <sup>a</sup>            | Category <sup>b</sup> | Model 1<br>n= 124 |                 | Model 2<br>n= 112 |                 | Model 3<br>n= 102 |                 |
|----------------------------------|-----------------------|-------------------|-----------------|-------------------|-----------------|-------------------|-----------------|
|                                  |                       | beta              | p-Value         | beta              | p-Value         | beta              | p-Value         |
| Gender                           | Male                  | .323              | .313            | .497              | .132            | .376              | .288            |
| Relationship with patient        | Partner/child         | .508              | .155            | .748              | <b>.042</b>     | .310              | .428            |
| Employment                       | Retired/other         | .272              | .566            | .457              | .345            | .884              | .100            |
| Support apart from study         | Unknown               | -.309             | .731            | -.490             | .575            | .617              | .529            |
|                                  | Support               | .426              | .297            | .201              | .623            | .687              | .142            |
| Group                            | sEBT intervention     | -.014             | .964            | -.211             | .507            | -.084             | .814            |
| Time of investigation            | t3                    | -.341             | .157            | -.447             | <b>.083</b>     | -.441             | .117            |
|                                  | t4                    | -.838             | .112            | -1.02             | <b>.070</b>     | -.982             | .101            |
| <b>Patient's time of death</b>   | Unknown               | .360              | .588            | -.053             | .939            | .003              | .996            |
|                                  | Alive                 | .424              | .175            | .271              | .405            | .293              | .412            |
|                                  | Deceased >3 months    | -1.13             | <b>.032</b>     | -1.02             | <b>.067</b>     | -1.13             | <b>.053</b>     |
| <b>Age</b>                       |                       | -.033             | <b>.060</b>     | -.044             | <b>.014</b>     | -.051             | <b>.008</b>     |
| Psychologist                     | Psychologist 1        | -.451             | .309            | -.637             | .145            | -.689             | .144            |
|                                  | Psychologist 2        | -.007             | .987            | -.099             | .826            | -.086             | .861            |
| <b>Subjective distress at t1</b> |                       | .405              | <b>&lt;.001</b> | .385              | <b>&lt;.001</b> | .450              | <b>&lt;.001</b> |

Table 6: Estimated regression coefficients beta and p-values for the independent variables in general linear mixed models with the secondary outcome variable post-treatment **subjective distress**. Main model: participants of at least the first two investigations (model 1); both sensitivity analyses include participants of at least the first two investigations, model 2 without participants (sEBT and control group) with only one session, model 3 without participants of the sEBT group who did not practise.

<sup>a</sup> Variables are in bold or bold italics depending on the significance of the F-test for the whole variable. Bold: significant at p-value<0.05. Bold italics: p-value between 0.05 and 0.10 (trend).

<sup>b</sup> Reference categories: Gender – Female; Relationship with Patient – Other; Employment – Employment/Student; Support apart from study – No support; Group – Control; Time of investigation – t2; Patient deceased – Deceased ≤ 3 months; Psychologist – Psychologist 3.

| Variable <sup>a</sup>        | Category <sup>b</sup> | Model 1<br>n= 122 |                 | Model 2<br>n= 110 |                 | Model 3<br>n= 100 |                 |
|------------------------------|-----------------------|-------------------|-----------------|-------------------|-----------------|-------------------|-----------------|
|                              |                       | beta              | p-Value         | beta              | p-Value         | beta              | p-Value         |
| Gender                       | Male                  | -.045             | .595            | -.128             | .153            | -.098             | .312            |
| Relationship with patient    | Partner/child         | -.094             | .311            | -.175             | <b>.077</b>     | -.015             | .885            |
| Employment                   | Retired/other         | -.072             | .566            | -.123             | .348            | -.175             | .233            |
| Support apart from study     | Unknown               | -.186             | .421            | -.168             | .465            | -.220             | .404            |
|                              | Support               | .097              | .384            | .164              | .153            | .190              | .153            |
| Group                        | sEBT intervention     | .018              | .822            | .044              | .603            | .065              | .495            |
| <b>Time of investigation</b> | t3                    | .158              | <b>.004</b>     | .172              | <b>.003</b>     | .211              | <b>.001</b>     |
|                              | t4                    | .290              | <b>.033</b>     | .317              | <b>.025</b>     | .357              | <b>.017</b>     |
| Patient's time of death      | Unknown               | -.016             | .927            | .047              | .791            | .022              | .904            |
|                              | Alive                 | .083              | .251            | .094              | .215            | .064              | .421            |
|                              | Deceased >3 months    | .110              | .413            | .045              | .741            | .105              | .464            |
| Age                          |                       | -.002             | .672            | .002              | .678            | -.001             | .876            |
| Psychologist                 | Psychologist 1        | .074              | .528            | .107              | .365            | .091              | .477            |
|                              | Psychologist 2        | .124              | .285            | .122              | .303            | .041              | .750            |
| <b>Positive affect at t1</b> |                       | .677              | <b>&lt;.001</b> | .637              | <b>&lt;.001</b> | .679              | <b>&lt;.001</b> |

Table 7: Estimated regression coefficients beta and p-values for the independent variables in general linear mixed models with the secondary outcome variable post-treatment of **positive affect**. Main model: participants of at least the first two investigations (model 1); both sensitivity analyses include participants of at least the first two investigations, model 2 without participants (sEBT and control group) with only one session, model 3 without participants of the sEBT group who did not practise.

<sup>a</sup> Variables are in bold or bold italics depending on the significance of the F-test for the whole variable. Bold: significant at p-value<0.05. Bold italics: p-value between 0.05 and 0.10 (trend).

<sup>b</sup> Reference categories: Gender – Female; Relationship with Patient – Other; Employment – Employment/Student; Support apart from study – No support; Group – Control; Time of investigation – t2; Patient deceased – Deceased ≤ 3 months; Psychologist – Psychologist 3.

| Variable <sup>a</sup>          | Category <sup>b</sup> | Model 1<br>n= 122 |                 | Model 2<br>n= 110 |                 | Model 3<br>n= 100 |                 |
|--------------------------------|-----------------------|-------------------|-----------------|-------------------|-----------------|-------------------|-----------------|
|                                |                       | beta              | p-Value         | beta              | p-Value         | beta              | p-Value         |
| Gender                         | Male                  | .049              | .536            | .096              | .274            | .082              | .350            |
| Relationship with patient      | Partner/child         | .119              | .163            | .160              | <b>.090</b>     | .072              | .445            |
| Employment                     | Retired/other         | .147              | .213            | .176              | .171            | .304              | <b>.023</b>     |
| Support apart from study       | Unknown               | .201              | .358            | .192              | .398            | .330              | .168            |
|                                | Support               | -.076             | .469            | -.105             | .350            | -.014             | .905            |
| Group                          | sEBT intervention     | -.080             | .288            | -.082             | .320            | -.112             | .202            |
| <b>Time of investigation</b>   | t3                    | -.127             | <b>.021</b>     | -.117             | <b>.051</b>     | -.120             | <b>.053</b>     |
|                                | t4                    | -.165             | .124            | -.188             | .111            | -.174             | .135            |
| <b>Patient's time of death</b> | Unknown               | .086              | .599            | .094              | .601            | .065              | .707            |
|                                | Alive                 | -.066             | .360            | -.058             | .464            | -.082             | .292            |
|                                | Deceased >3 months    | -.289             | <b>.008</b>     | -.263             | <b>.027</b>     | -.278             | <b>.018</b>     |
| Age                            |                       | -.005             | .237            | -.007             | .167            | -.010             | <b>.035</b>     |
| Psychologist                   | Psychologist 1        | -.147             | .182            | -.163             | .160            | -.199             | <b>.089</b>     |
|                                | Psychologist 2        | .028              | .795            | .045              | .696            | .102              | .393            |
| <b>Negative affect at t1</b>   |                       | .531              | <b>&lt;.001</b> | .543              | <b>&lt;.001</b> | .504              | <b>&lt;.001</b> |

Table 8: Estimated regression coefficients beta and p-values for the independent variables in general linear mixed models with the secondary outcome variable post-treatment **negative affect**. Main model: participants of at least the first two investigations (model 1); both sensitivity analyses include participants of at least the first two investigations, model 2 without participants (sEBT and control group) with only one session, model 3 without participants of the sEBT group who did not practise.

<sup>a</sup> Variables are in bold or bold italics depending on the significance of the F-test for the whole variable. Bold: significant at p-value<0.05. Bold italics: p-value between 0.05 and 0.10 (trend).

<sup>b</sup> Reference categories: Gender – Female; Relationship with Patient – Other; Employment – Employment/Student; Support apart from study – No support; Group – Control; Time of investigation – t2; Patient deceased – Deceased ≤ 3 months; Psychologist – Psychologist 3.

| Variable <sup>a</sup>               | Category <sup>b</sup> | Model 1<br>n= 126 |                 | Model 2<br>n= 114 |                 | Model 3<br>n= 104 |                 |
|-------------------------------------|-----------------------|-------------------|-----------------|-------------------|-----------------|-------------------|-----------------|
|                                     |                       | beta              | p-Value         | beta              | p-Value         | beta              | p-Value         |
| Gender                              | Male                  | -.090             | .898            | .447              | .543            | .050              | .950            |
| Relationship with patient           | Partner/child         | 1.25              | .113            | 1.79              | <b>.030</b>     | .835              | .335            |
| Employment                          | Retired/other         | -1.53             | .151            | -.896             | .413            | -.773             | .523            |
| Support apart from study            | Unknown               | 1.90              | .339            | 1.75              | .368            | 3.07              | .162            |
|                                     | Support               | .794              | .384            | .420              | .649            | .650              | .533            |
| Group                               | sEBT intervention     | -.405             | .548            | -.683             | .349            | -.825             | .295            |
| <b>Time of investigation</b>        | t3                    | -1.32             | <b>.009</b>     | -1.64             | <b>.003</b>     | -1.62             | <b>.006</b>     |
|                                     | t4                    | -2.96             | <b>.010</b>     | -3.30             | <b>.008</b>     | -3.54             | <b>.006</b>     |
| Patient's time of death             | Unknown               | -.869             | .555            | -1.68             | .274            | -1.44             | .366            |
|                                     | Alive                 | -.915             | .165            | -1.30             | <b>.059</b>     | -1.32             | <b>.082</b>     |
|                                     | Deceased >3 months    | -1.49             | .206            | -1.28             | .310            | -1.35             | .293            |
| Age                                 |                       | .032              | .431            | .001              | .989            | .014              | .750            |
| Psychologist                        | Psychologist 1        | .062              | .950            | -.062             | .950            | -.441             | .677            |
|                                     | Psychologist 2        | -.162             | .864            | -.296             | .757            | -.193             | .855            |
| <b>Minor mental disorders at t1</b> |                       | .598              | <b>&lt;.001</b> | .606              | <b>&lt;.001</b> | .579              | <b>&lt;.001</b> |

Table 9: Estimated regression coefficients beta and p-values for the independent variables in general linear mixed models with the secondary outcome variable post-treatment **minor mental disorders**. Main model: participants of at least the first two investigations (model 1); both sensitivity analyses include participants of at least the first two investigations, model 2 without participants (sEBT and control group) with only one session, model 3 without participants of the sEBT group who did not practise.

<sup>a</sup> Variables are in bold or bold italics depending on the significance of the F-test for the whole variable. Bold: significant at p-value<0.05. Bold italics: p-value between 0.05 and 0.10 (trend).

<sup>b</sup> Reference categories: Gender – Female; Relationship with Patient – Other; Employment – Employment/Student; Support apart from study – No support; Group – Control; Time of investigation – t2; Patient deceased – Deceased ≤ 3 months; Psychologist – Psychologist 3.

| Variable <sup>a</sup>               | Category <sup>b</sup> | Model 1<br>n= 126 |                 | Model 2<br>n= 114 |                 | Model 3<br>n= 104 |                 |
|-------------------------------------|-----------------------|-------------------|-----------------|-------------------|-----------------|-------------------|-----------------|
|                                     |                       | beta              | p-Value         | beta              | p-Value         | beta              | p-Value         |
| Gender                              | Male                  | -.105             | .887            | -.356             | .654            | .176              | .824            |
| Relationship with patient           | Partner/child         | -.226             | .781            | -.149             | .865            | .077              | .930            |
| Employment                          | Retired/other         | -.605             | .583            | -.1.39            | .238            | -2.28             | <b>.063</b>     |
| Support apart from study            | Unknown               | -.014             | .995            | .150              | .942            | -2.59             | .245            |
|                                     | Support               | -.372             | .693            | -.236             | .811            | -.508             | .633            |
| Group                               | sEBT intervention     | -.137             | .842            | .061              | .934            | .668              | .393            |
| Time of investigation               | t3                    | -.472             | .232            | -.313             | .456            | -.269             | .549            |
|                                     | t4                    | -.608             | .479            | -.357             | .698            | -.233             | .808            |
| <b>Patient's time of death</b>      | Unknown               | -1.70             | .255            | -1.23             | .444            | -1.19             | .448            |
|                                     | Alive                 | -1.38             | <b>.014</b>     | -1.05             | <b>.077</b>     | -1.38             | <b>.031</b>     |
|                                     | Deceased >3 months    | .984              | .247            | .737              | .419            | .925              | .318            |
| Age                                 |                       | .012              | .774            | .034              | .428            | .038              | .391            |
| Psychologist                        | Psychologist 1        | .463              | .652            | .508              | .630            | 1.05              | .328            |
|                                     | Psychologist 2        | -.118             | .902            | -.059             | .953            | -.521             | .611            |
| <b>Satisfaction with life at t1</b> |                       | .643              | <b>&lt;.001</b> | .660              | <b>&lt;.001</b> | .607              | <b>&lt;.001</b> |

Table 10: Estimated regression coefficients beta and p-values for the independent variables in general linear mixed models with the secondary outcome variable post-treatment **satisfaction with life**. Main model: participants of at least the first two investigations (model 1); both sensitivity analyses include participants of at least the first two investigations, model 2 without participants (sEBT and control group) with only one session, model 3 without participants of the sEBT group who did not practise.

<sup>a</sup> Variables are in bold or bold italics depending on the significance of the F-test for the whole variable. Bold: significant at p-value<0.05. Bold italics: p-value between 0.05 and 0.10 (trend).

<sup>b</sup> Reference categories: Gender – Female; Relationship with Patient – Other; Employment – Employment/Student; Support apart from study – No support; Group – Control; Time of investigation – t2; Patient deceased – Deceased ≤ 3 months; Psychologist – Psychologist 3.



| Variable <sup>a</sup>                                    | Category <sup>b</sup> | Model 1<br>n= 126 |                 | Model 2<br>n= 114 |                 | Model 3<br>n= 104 |                 |
|----------------------------------------------------------|-----------------------|-------------------|-----------------|-------------------|-----------------|-------------------|-----------------|
|                                                          |                       | beta              | p-Value         | beta              | p-Value         | beta              | p-Value         |
| Gender                                                   | Male                  | -4.08             | .102            | -5.69             | <b>.030</b>     | -3.95             | .155            |
| Relationship with patient                                | Partner/child         | -1.33             | .630            | -.904             | .752            | -1.58             | .609            |
| Employment                                               | Retired/other         | 1.87              | .620            | -.362             | .925            | 1.23              | .777            |
| Support apart from study                                 | Unknown               | -4.75             | .510            | -6.23             | .375            | -8.53             | .285            |
|                                                          | Support               | -1.05             | .743            | -1.55             | .633            | -2.96             | .428            |
| Group                                                    | sEBT intervention     | -2.16             | .360            | -1.12             | .647            | -3.13             | .266            |
| Time of investigation                                    | t3                    | .837              | .665            | 1.27              | .508            | 2.13              | .297            |
|                                                          | t4                    | -.800             | .862            | -.083             | .986            | -.466             | .923            |
| Patient's time of death                                  | Unknown               | -.833             | .873            | -.449             | .933            | .261              | .962            |
|                                                          | Alive                 | .186              | .941            | 1.36              | .588            | .595              | .826            |
|                                                          | Deceased >3 months    | 4.75              | .314            | 5.40              | .257            | 5.89              | .225            |
| Age                                                      |                       | -.141             | .324            | -.127             | .377            | -.132             | .411            |
| Psychologist                                             | Psychologist 1        | -1.74             | .622            | -3.00             | .394            | -1.11             | .769            |
|                                                          | Psychologist 2        | -2.99             | .369            | -3.18             | .344            | -1.96             | .597            |
| <b>Quality of life (World Health Organisation) at t1</b> |                       | .451              | <b>&lt;.001</b> | .518              | <b>&lt;.001</b> | .467              | <b>&lt;.001</b> |

Table 11: Estimated regression coefficients beta and p-values for the independent variables in general linear mixed models with the secondary outcome variable post-treatment **quality of life (World Health Organisation)**. Main model: participants of at least the first two investigations (model 1); both sensitivity analyses include participants of at least the first two investigations, model 2 without participants (sEBT and control group) with only one session, model 3 without participants of the sEBT group who did not practise.

<sup>a</sup> Variables are in bold or bold italics depending on the significance of the F-test for the whole variable. Bold: significant at p-value<0.05. Bold italics: p-value between 0.05 and 0.10 (trend).

<sup>b</sup> Reference categories: Gender – Female; Relationship with Patient – Other; Employment – Employment/Student; Support apart from study – No support; Group – Control; Time of investigation – t2; Patient deceased – Deceased ≤ 3 months; Psychologist – Psychologist 3.

| Variable <sup>a</sup>                                 | Category <sup>b</sup> | Model 1<br>n= 123 |             | Model 2<br>n= 111 |             | Model 3<br>n= 102 |             |
|-------------------------------------------------------|-----------------------|-------------------|-------------|-------------------|-------------|-------------------|-------------|
|                                                       |                       | beta              | p-Value     | beta              | p-Value     | beta              | p-Value     |
| Gender                                                | Male                  | -.425             | .176        | -.669             | <b>.047</b> | -.413             | .248        |
| <b>Relationship with pat.</b>                         | Partner/child         | -.680             | <b>.047</b> | -.804             | <b>.028</b> | -.459             | .235        |
| Employment                                            | Retired/other         | -.601             | .197        | -.876             | <b>.077</b> | -.907             | <b>.097</b> |
| Support apart from study                              | Unknown               | -1.35             | .126        | -1.29             | .143        | -1.93             | <b>.051</b> |
|                                                       | Support               | .167              | .675        | .309              | .455        | .126              | .789        |
| Group                                                 | sEBT intervention     | -.004             | .989        | .170              | .587        | .228              | .512        |
| <b>Time of investigation</b>                          | t3                    | .444              | <b>.029</b> | .422              | <b>.053</b> | .476              | <b>.044</b> |
|                                                       | t4                    | .574              | .146        | .807              | <b>.056</b> | .761              | <b>.092</b> |
| Patient's time of death                               | Unknown               | .366              | .571        | .313              | .647        | .278              | .691        |
|                                                       | Alive                 | -.049             | .862        | -.147             | .620        | .063              | .845        |
|                                                       | Deceased >3 months    | .856              | <b>.032</b> | .543              | .195        | .795              | <b>.073</b> |
| Age                                                   |                       | .014              | .424        | .024              | .182        | .017              | .373        |
| Psychologist                                          | Psychologist 1        | .095              | .826        | .234              | .598        | .014              | .977        |
|                                                       | Psychologist 2        | -.091             | .825        | -.039             | .927        | -.378             | .418        |
| <b>Quality of Life (numerical rating scale) at t1</b> |                       | .206              | <b>.004</b> | .187              | <b>.012</b> | .167              | <b>.042</b> |

Table 12: Estimated regression coefficients beta and p-values for the independent variables in general linear mixed models with the secondary outcome variable post-treatment **quality of life (numerical rating scale)**. Main model: participants of at least the first two investigations (model 1); both sensitivity analyses include participants of at least the first two investigations, model 2 without participants (sEBT and control group) with only one session, model 3 without participants of the sEBT group who did not practise.

<sup>a</sup> Variables are in bold or bold italics depending on the significance of the F-test for the whole variable. Bold: significant at p-value<0.05. Bold italics: p-value between 0.05 and 0.10 (trend).

<sup>b</sup> Reference categories: Gender – Female; Relationship with Patient – Other; Employment – Employment/Student; Support apart from study – No support; Group – Control; Time of investigation – t2; Patient deceased – Deceased ≤ 3 months; Psychologist – Psychologist 3.

| Variable <sup>a</sup>            | Category <sup>b</sup> | Model 1<br>n= 126 |                 | Model 2<br>n= 114 |                 | Model 3<br>n= 104 |                 |
|----------------------------------|-----------------------|-------------------|-----------------|-------------------|-----------------|-------------------|-----------------|
|                                  |                       | beta              | p-Value         | beta              | p-Value         | beta              | p-Value         |
| Gender                           | Male                  | -.255             | .469            | -.141             | .699            | -.262             | .509            |
| Relationship with patient        | Partner/child         | .468              | .223            | .712              | .075            | .299              | .494            |
| Employment                       | Retired/other         | .628              | .231            | .369              | .507            | .691              | .266            |
| Support apart from study         | Unknown               | .593              | .550            | .392              | .689            | .432              | .699            |
|                                  | Support               | -.156             | .733            | -.256             | .582            | -.183             | .731            |
| Group                            | sEBT intervention     | .006              | .986            | .028              | .935            | -.059             | .881            |
| Time of investigation            | t3                    | .049              | .852            | .005              | .987            | .107              | .709            |
|                                  | t4                    | .728              | .171            | .548              | .327            | .526              | .364            |
| Patient's time of death          | Unknown               | .316              | .667            | .522              | .497            | .612              | .442            |
|                                  | Alive                 | -.272             | .403            | -.439             | .205            | -.269             | .458            |
|                                  | Deceased >3 months    | -.889             | .100            | -.860             | .130            | -.795             | .169            |
| Age                              |                       | -.011             | .574            | -.016             | .423            | -.001             | .980            |
| Psychologist                     | Psychologist 1        | -.770             | .125            | -.868             | .083            | -.775             | .156            |
|                                  | Psychologist 2        | -.146             | .756            | -.214             | .655            | .006              | .991            |
| <b>Physical impairment at t1</b> |                       | .518              | <b>&lt;.001</b> | .543              | <b>&lt;.001</b> | .517              | <b>&lt;.001</b> |

Table 13: Estimated regression coefficients beta and p-values for the independent variables in general linear mixed models with the secondary outcome variable post-treatment **physical impairment**. Main model: participants of at least the first two investigations (model 1); both sensitivity analyses include participants of at least the first two investigations, model 2 without participants (sEBT and control group) with only one session, model 3 without participants of the sEBT group who did not practise.

<sup>a</sup> Variables are in bold or bold italics depending on the significance of the F-test for the whole variable. Bold: significant at p-value<0.05. Bold italics: p-value between 0.05 and 0.10 (trend).

<sup>b</sup> Reference categories: Gender – Female; Relationship with Patient – Other; Employment – Employment/Student; Support apart from study – No support; Group – Control; Time of investigation – t2; Patient deceased – Deceased ≤ 3 months; Psychologist – Psychologist 3.

| Variable <sup>a</sup>                 | Category <sup>b</sup> | Model 1<br>n= 126 |                 | Model 2<br>n= 114 |                 | Model 3<br>n= 104 |                 |
|---------------------------------------|-----------------------|-------------------|-----------------|-------------------|-----------------|-------------------|-----------------|
|                                       |                       | beta              | p-Value         | beta              | p-Value         | beta              | p-Value         |
| <b>Gender</b>                         | Male                  | -.613             | <b>.092</b>     | -.350             | .362            | -.475             | .251            |
| Relationship with patient             | Partner/child         | .402              | .312            | .509              | .228            | .240              | .594            |
| Employment                            | Retired/other         | .445              | .415            | .613              | .288            | 1.01              | .118            |
| Support apart from study              | Unknown               | .438              | .666            | .305              | .764            | 1.26              | .276            |
|                                       | Support               | .144              | .757            | -.068             | .889            | .078              | .888            |
| Group                                 | sEBT intervention     | -.846             | .040            | -.934             | <b>.029</b>     | -.900             | .064            |
| Time of investigation                 | t3                    | 2.15              | .146            | 2.21              | .170            | 2.09              | .194            |
|                                       | t4                    | -1.72             | <b>.005</b>     | -2.11             | <b>.001</b>     | -2.08             | <b>.002</b>     |
| <b>Time of investigation*Group</b>    | t3 * sEBT             | -2.39             | .265            | -2.47             | .295            | -2.30             | .386            |
|                                       | t4 * sEBT             | 1.14              | <b>.025</b>     | .938              | <b>.075</b>     | .613              | .286            |
| <b>Patient's time of death</b>        | Unknow                | 1.83              | <b>.021</b>     | 1.74              | <b>.040</b>     | 1.80              | <b>.039</b>     |
|                                       | Alive                 | .615              | .120            | .484              | .236            | .507              | .254            |
|                                       | Deceased >3 months    | -.456             | .467            | -.118             | .860            | -.072             | .918            |
| Age                                   |                       | -.010             | .604            | -.023             | .277            | -.028             | .209            |
| Psychologist                          | Psychologist 1        | -.460             | .373            | -.540             | .304            | -.512             | .374            |
|                                       | Psychologist 2        | .346              | .472            | .290              | .560            | .723              | .189            |
| <b>Psychological impairment at t1</b> |                       | .446              | <b>&lt;.001</b> | .440              | <b>&lt;.001</b> | .418              | <b>&lt;.001</b> |

Table 14: Estimated regression coefficients beta and p-values for the independent variables in general linear mixed models with the secondary outcome variable post-treatment **psychological impairment**. Main model: participants of at least the first two investigations (model 1); both sensitivity analyses include participants of at least the first two investigations, model 2 without participants (sEBT and control group) with only one session, model 3 without participants of the sEBT group who did not practise.

<sup>a</sup> Variables are in bold or bold italics depending on the significance of the F-test for the whole variable. Bold: significant at p-value<0.05. Bold italics: p-value between 0.05 and 0.10 (trend).

<sup>b</sup> Reference categories: Gender – Female; Relationship with Patient – Other; Employment – Employment/Student; Support apart from study – No support; Group – Control; Time of investigation – t2; Time of investigation\*Group – t2\*sEBT, t2\*Control, t3\*Control, t4\*Control; Patient deceased – Deceased ≤ 3 months; Psychologist – Psychologist 3.

## Appendix C: Results of sensitivity analyses regarding missing data

| Variable <sup>a</sup>        | Category <sup>b</sup> | Model 1<br>n= 126 |                 | Model 2<br>n= 114 |                 | Model 3<br>n= 104 |                 |
|------------------------------|-----------------------|-------------------|-----------------|-------------------|-----------------|-------------------|-----------------|
|                              |                       | beta              | p-Value         | beta              | p-Value         | beta              | p-Value         |
| Gender                       | Male                  | -.468             | .396            | -.323             | .593            | -.585             | .328            |
| Relationship with patient    | Partner/child         | -.898             | .172            | -.799             | .266            | -1.12             | .116            |
| Employment                   | Retired/other         | -.716             | .396            | -.365             | .691            | .410              | .661            |
| Support apart from study     | Unknown               | 1.39              | .371            | 1.30              | .417            | 2.01              | .232            |
|                              | Support               | .701              | .331            | .503              | .516            | .857              | .287            |
| Group                        | sEBT intervention     | -.174             | .741            | -.253             | .666            | -.387             | .522            |
| <b>Time of investigation</b> | t3                    | -.806             | <b>.029</b>     | -.966             | <b>.015</b>     | -.989             | <b>.020</b>     |
|                              | t4                    | -1.35             | <b>.078</b>     | -1.75             | <b>.034</b>     | -1.78             | <b>.032</b>     |
| Patients' time of death      | Unknown               | .350              | .764            | .073              | .955            | -.041             | .973            |
|                              | Alive <sup>a</sup>    | -.406             | .391            | -.514             | .312            | -.633             | .238            |
|                              | Deceased >3 months    | -.991             | .196            | -.878             | .281            | -.858             | .290            |
| Age                          |                       | .026              | .417            | .014              | .679            | -.005             | .884            |
| Psychologist                 | Psychologist 1        | -.166             | .833            | -.269             | .745            | -.551             | .500            |
|                              | Psychologist 2        | .448              | .547            | .312              | .695            | .654              | .423            |
| Missing data                 | No missing data       | -.615             | .303            | -.647             | .324            | -.611             | .333            |
| <b>Depression at t1</b>      |                       | .619              | <b>&lt;.001</b> | .630              | <b>&lt;.001</b> | .603              | <b>&lt;.001</b> |

Table 15. **Sensitivity analyses regarding missing data:** Estimated regression coefficients beta and p-values for the independent variables in general linear mixed models with the primary outcome variable post-treatment **depression**. Main model: participants of at least the first two investigations (model 1); both sensitivity analyses include participants of at least the first two investigations, model 2 without participants (sEBT and control group) with only one session, model 3 without participants of the sEBT group who did not practise.

<sup>a</sup> Variables are in bold or bold italics depending on the significance of the F-test for the whole variable. Bold: significant at p-value<0.05. Bold italics: p-value between 0.05 and 0.10 (trend).

<sup>b</sup> Reference categories: Gender – Female; Relationship with Patient – Other; Employment – Employment/Student; Support apart from study – No support; Group – Control; Time of investigation – t2; Patient deceased – Deceased≤3 months; Psychologist – Psychologist; Missing data – Missing data in outcome scales.

| Variable <sup>a</sup>                 | Category <sup>b</sup> | Model 1<br>n= 126 |                 | Model 2<br>n= 114 |                 | Model 3<br>n= 104 |                 |
|---------------------------------------|-----------------------|-------------------|-----------------|-------------------|-----------------|-------------------|-----------------|
|                                       |                       | beta              | p-Value         | beta              | p-Value         | beta              | p-Value         |
| Gender                                | Male                  | -.797             | .176            | -.595             | .357            | -.810             | .217            |
| Relationship with patient             | Partner/child         | -.230             | .9736           | -.144             | .847            | -.480             | .523            |
| Employment                            | Retired/other         | .042              | .963            | .303              | .755            | 1.19              | .241            |
| Support apart from study              | Unknown               | 1.75              | .292            | 1.85              | .285            | 2.74              | .135            |
|                                       | Support               | .500              | .514            | .554              | .501            | .911              | .300            |
| Group                                 | sEBT intervention     | -.351             | .530            | -.564             | .361            | -.915             | .162            |
| <b>Time of investigation</b>          | t3                    | -1.22             | <b>.003</b>     | -1.24             | <b>.006</b>     | -1.41             | <b>.002</b>     |
|                                       | t4                    | -1.70             | <b>.020</b>     | -1.77             | <b>.025</b>     | -2.27             | <b>.005</b>     |
| <b><i>Patient's time of death</i></b> | Unknown               | .637              | .611            | .281              | .838            | .091              | .947            |
|                                       | Alive                 | -.017             | .974            | .086              | .881            | -.459             | .441            |
|                                       | Deceased >3 months    | -1.52             | <b>.033</b>     | -1.56             | <b>.042</b>     | -1.24             | .108            |
| Age                                   |                       | -.005             | .876            | -.015             | .676            | -.039             | .284            |
| Psychologist                          | Psychologist 1        | -.108             | .993            | .042              | .962            | -.278             | .754            |
|                                       | Psychologist 2        | -.510             | .512            | -.568             | .496            | -.408             | .638            |
| Missing data                          | No missing data       | -.679             | .286            | -.628             | .370            | -.699             | .311            |
| <b>Anxiety at t1</b>                  |                       | .574              | <b>&lt;.001</b> | .553              | <b>&lt;.001</b> | .512              | <b>&lt;.001</b> |

Table 16. **Sensitivity analyses regarding missing data:** Estimated regression coefficients beta and p-values for the independent variables in general linear mixed models with the secondary outcome variable post-treatment **anxiety**. Main model: participants of at least the first two investigations (model 1); both sensitivity analyses include participants of at least the first two investigations, model 2 without participants (sEBT and control group) with only one session, model 3 without participants of the sEBT group who did not practise.

<sup>a</sup> Variables are in bold or bold italics depending on the significance of the F-test for the whole variable. Bold: significant at p-value<0.05. Bold italics: p-value between 0.05 and 0.10 (trend).

<sup>b</sup> Reference categories: Gender – Female; Relationship with Patient – Other; Employment – Employment/Student; Support apart from study – No support; Group – Control; Time of investigation – t2; Patient deceased – Deceased ≤ 3 months; Psychologist – Psychologist; Missing data – Missing data in outcome scales.

| Variable <sup>a</sup>                 | Category <sup>b</sup> | Model 1<br>n= 124 |                 | Model 2<br>n= 112 |                 | Model 3<br>n= 102 |                 |
|---------------------------------------|-----------------------|-------------------|-----------------|-------------------|-----------------|-------------------|-----------------|
|                                       |                       | beta              | p-Value         | beta              | p-Value         | beta              | p-Value         |
| Gender                                | Male                  | .311              | .333            | .486              | .143            | .370              | .298            |
| Relationship with patient             | Partner/child         | .443              | .242            | .700              | <b>.074</b>     | .245              | .553            |
| Employment                            | Retired/other         | .256              | .591            | .441              | .366            | .865              | .110            |
| Support apart from study              | Unknown               | -.311             | .731            | -.494             | .574            | .619              | .529            |
|                                       | Support               | .449              | .278            | .223              | .592            | .700              | .138            |
| Group                                 | sEBT intervention     | -.020             | .948            | -.202             | .529            | -.078             | .829            |
| Time of investigation                 | t3                    | -.345             | .153            | -.450             | <b>.081</b>     | -.443             | .115            |
|                                       | t4                    | -.852             | .107            | -1.03             | <b>.067</b>     | -.938             | <b>.098</b>     |
| <b><i>Patient's time of death</i></b> | Unknown               | .293              | .666            | -.093             | .894            | -.073             | .919            |
|                                       | Alive <sup>a</sup>    | .416              | .185            | .266              | .416            | .291              | .417            |
|                                       | Deceased >3 months    | -1.12             | <b>.034</b>     | -1.01             | <b>.070</b>     | -1.12             | <b>.057</b>     |
| <b>Age</b>                            |                       | -.034             | <b>.060</b>     | -.044             | <b>.014</b>     | -.051             | <b>.008</b>     |
| Psychologist                          | Psychologist 1        | -.432             | .334            | -.620             | .160            | -.676             | .155            |
|                                       | Psychologist 2        | -.012             | .978            | -.100             | .827            | -.088             | .858            |
| Missing data                          | No missing data       | -.190             | .583            | -.143             | .689            | -.203             | .584            |
| <b>Subjective distress at t1</b>      |                       | .410              | <b>&lt;.001</b> | .391              | <b>&lt;.001</b> | .456              | <b>&lt;.001</b> |

Table 17. **Sensitivity analyses regarding missing data:** Estimated regression coefficients beta and p-values for the independent variables in general linear mixed models with the secondary outcome variable post-treatment **subjective distress**. Main model: participants of at least the first two investigations (model 1); both sensitivity analyses include participants of at least the first two investigations, model 2 without participants (sEBT and control group) with only one session, model 3 without participants of the sEBT group who did not practise.

<sup>a</sup> Variables are in bold or bold italics depending on the significance of the F-test for the whole variable. Bold: significant at p-value<0.05. Bold italics: p-value between 0.05 and 0.10 (trend).

<sup>b</sup> Reference categories: Gender – Female; Relationship with Patient – Other; Employment – Employment/Student; Support apart from study – No support; Group – Control; Time of investigation – t2; Patient deceased – Deceased ≤ 3 months; Psychologist – Psychologist 3; Missing data – Missing data in outcome scales.

| Variable <sup>a</sup>        | Category <sup>b</sup> | Model 1<br>n= 122 |                 | Model 2<br>n= 110 |                 | Model 3<br>n= 100 |                 |
|------------------------------|-----------------------|-------------------|-----------------|-------------------|-----------------|-------------------|-----------------|
|                              |                       | beta              | p-Value         | beta              | p-Value         | beta              | p-Value         |
| Gender                       | Male                  | -.046             | .592            | -.127             | .158            | -.102             | .289            |
| Relationship with patient    | Partner/child         | -.074             | .448            | -.146             | .160            | .024              | .826            |
| Employment                   | Retired/other         | -.064             | .611            | -.109             | .409            | -.159             | .276            |
| Support apart from study     | Unknown               | -.188             | .419            | -.168             | .464            | -.225             | .391            |
|                              | Support               | .086              | .445            | .146              | .215            | .178              | .182            |
| Group                        | sEBT intervention     | .022              | .788            | .044              | .600            | .065              | .495            |
| <b>Time of investigation</b> | t3                    | .159              | <b>.003</b>     | .173              | <b>.003</b>     | .211              | <b>.000</b>     |
|                              | t4                    | .293              | <b>.031</b>     | .321              | <b>.024</b>     | .360              | <b>.016</b>     |
| Patient's time of death      | Unknown               | .003              | .987            | .074              | .685            | .061              | .747            |
|                              | Alive                 | .085              | .241            | .098              | .199            | .066              | .405            |
|                              | Deceased >3 months    | .107              | .424            | .042              | .761            | .103              | .474            |
| Age                          |                       | -.002             | .651            | .002              | .706            | -.001             | .821            |
| Psychologist                 | Psychologist 1        | .065              | .585            | .092              | .440            | .079              | .537            |
|                              | Psychologist 2        | .121              | .298            | .115              | .332            | .035              | .788            |
| Missing data                 | No missing data       | .052              | .565            | .080              | .400            | .103              | .305            |
| <b>Positive affect at t1</b> |                       | .681              | <b>&lt;.001</b> | .644              | <b>&lt;.001</b> | .692              | <b>&lt;.001</b> |

Table 18. **Sensitivity analyses regarding missing data:** Estimated regression coefficients beta and p-values for the independent variables in general linear mixed models with the secondary outcome variable post-treatment of **positive affect**. Main model: participants of at least the first two investigations (model 1); both sensitivity analyses include participants of at least the first two investigations, model 2 without participants (sEBT and control group) with only one session, model 3 without participants of the sEBT group who did not practise.

<sup>a</sup> Variables are in bold or bold italics depending on the significance of the F-test for the whole variable. Bold: significant at p-value<0.05. Bold italics: p-value between 0.05 and 0.10 (trend).

<sup>b</sup> Reference categories: Gender – Female; Relationship with Patient – Other; Employment – Employment/Student; Support apart from study – No support; Group – Control; Time of investigation – t2; Patient deceased – Deceased ≤ 3 months; Psychologist – Psychologist 3; Missing data – Missing data in outcome scales.



| Variable <sup>a</sup>          | Category <sup>b</sup> | Model 1<br>n= 122 |                 | Model 2<br>n= 110 |                 | Model 3<br>n= 100 |                 |
|--------------------------------|-----------------------|-------------------|-----------------|-------------------|-----------------|-------------------|-----------------|
|                                |                       | beta              | p-Value         | beta              | p-Value         | beta              | p-Value         |
| Gender                         | Male                  | .051              | .520            | .095              | .273            | .085              | .325            |
| Relationship with patient      | Partner/child         | .067              | .450            | .103              | .286            | .009              | .928            |
| Employment                     | Retired/other         | .125              | .282            | .145              | .256            | .276              | <b>.037</b>     |
| Support apart from study       | Unknown               | .211              | .331            | .200              | .376            | .351              | .136            |
|                                | Support               | -.048             | .648            | -.067             | .551            | .010              | .936            |
| Group                          | sEBT intervention     | -.089             | .233            | -.079             | .333            | -.113             | .188            |
| <b>Time of investigation</b>   | t3                    | -.130             | <b>.019</b>     | -.120             | <b>.046</b>     | -.122             | <b>.049</b>     |
|                                | t4                    | -.175             | .102            | -.196             | <b>.096</b>     | -.182             | .115            |
| <b>Patient's time of death</b> | Unknown               | .032              | .844            | .037              | .836            | -.001             | .997            |
|                                | Alive                 | -.074             | .307            | -.065             | .411            | -.088             | .260            |
|                                | Deceased >3 months    | -.281             | <b>.009</b>     | -.255             | <b>.030</b>     | -.270             | <b>.020</b>     |
| Age                            |                       | -.005             | .258            | -.006             | .180            | -.010             | <b>.042</b>     |
| Psychologist                   | Psychologist 1        | -.126             | .252            | -.136             | .239            | -.185             | .110            |
|                                | Psychologist 2        | .033              | .757            | .057              | .614            | .103              | .380            |
| <b>Missing data</b>            | No missing data       | -.155             | <b>.064</b>     | -.177             | <b>.055</b>     | -.183             | <b>.042</b>     |
| <b>Negative affect at t1</b>   |                       | .543              | <b>&lt;.001</b> | .563              | <b>&lt;.001</b> | .526              | <b>&lt;.001</b> |

Table 19. **Sensitivity analyses regarding missing data:** Estimated regression coefficients beta and p-values for the independent variables in general linear mixed models with the secondary outcome variable post-treatment **negative affect**. Main model: participants of at least the first two investigations (model 1); both sensitivity analyses include participants of at least the first two investigations, model 2 without participants (sEBT and control group) with only one session, model 3 without participants of the sEBT group who did not practise.

<sup>a</sup> Variables are in bold or bold italics depending on the significance of the F-test for the whole variable. Bold: significant at p-value<0.05. Bold italics: p-value between 0.05 and 0.10 (trend).

<sup>b</sup> Reference categories: Gender – Female; Relationship with Patient – Other; Employment – Employment/Student; Support apart from study – No support; Group – Control; Time of investigation – t2; Patient deceased – Deceased ≤ 3 months; Psychologist – Psychologist 3; Missing data – Missing data in outcome scales.

| Variable <sup>a</sup>               | Category <sup>b</sup> | Model 1<br>n= 126 |                 | Model 2<br>n= 114 |                 | Model 3<br>n= 104 |                 |
|-------------------------------------|-----------------------|-------------------|-----------------|-------------------|-----------------|-------------------|-----------------|
|                                     |                       | beta              | p-Value         | beta              | p-Value         | beta              | p-Value         |
| Gender                              | Male                  | -.130             | .854            | .368              | .614            | .054              | .945            |
| Relationship with patient           | Partner/child         | .848              | .309            | 1.30              | .133            | .397              | .661            |
| Employment                          | Retired/other         | -1.6              | .124            | -1.09             | .317            | -.933             | .441            |
| Support apart from study            | Unknown               | 1.87              | .345            | 1.71              | .375            | 3.07              | .159            |
|                                     | Support               | .962              | .295            | .701              | .452            | .782              | .453            |
| Group                               | sEBT intervention     | -.440             | .512            | -.640             | .356            | -.801             | .307            |
| <b>Time of investigation</b>        | t3                    | -1.34             | <b>.008</b>     | -1.66             | <b>.002</b>     | -1.63             | <b>.006</b>     |
|                                     | t4                    | -3.03             | <b>.008</b>     | -3.38             | <b>.007</b>     | -3.60             | <b>.005</b>     |
| Patient's time of death             | Unknown               | -1.26             | .399            | -2.13             | .168            | -1.94             | .229            |
|                                     | Alive                 | -.960             | .146            | -1.35             | <b>.050</b>     | -1.33             | <b>.078</b>     |
|                                     | Deceased >3 months    | -1.40             | .232            | -1.19             | .344            | -1.28             | .317            |
| Age                                 |                       | .032              | .420            | .002              | .970            | .015              | .733            |
| Psychologist                        | Psychologist 1        | .191              | .847            | .140              | .887            | -.319             | .763            |
|                                     | Psychologist 2        | -.214             | .821            | -.306             | .747            | -.257             | .807            |
| Missing data                        | No missing data       | -1.08             | .158            | -1.33             | <b>.095</b>     | -1.27             | .125            |
| <b>Minor mental disorders at t1</b> |                       | .612              | <b>&lt;.001</b> | .627              | <b>&lt;.001</b> | .598              | <b>&lt;.001</b> |

Table 20. **Sensitivity analyses regarding missing data:** Estimated regression coefficients beta and p-values for the independent variables in general linear mixed models with the secondary outcome variable post-treatment **minor mental disorders**. Main model: participants of at least the first two investigations (model 1); both sensitivity analyses include participants of at least the first two investigations, model 2 without participants (sEBT and control group) with only one session, model 3 without participants of the sEBT group who did not practise.

<sup>a</sup> Variables are in bold or bold italics depending on the significance of the F-test for the whole variable. Bold: significant at p-value<0.05. Bold italics: p-value between 0.05 and 0.10 (trend).

<sup>b</sup> Reference categories: Gender – Female; Relationship with Patient – Other; Employment – Employment/Student; Support apart from study – No support; Group – Control; Time of investigation – t2; Patient deceased – Deceased ≤ 3 months; Psychologist – Psychologist 3; Missing data – Missing data in outcome scales.

| Variable <sup>a</sup>               | Category <sup>b</sup> | Model 1<br>n= 126 |                 | Model 2<br>n= 114 |                 | Model 3<br>n= 104 |                 |
|-------------------------------------|-----------------------|-------------------|-----------------|-------------------|-----------------|-------------------|-----------------|
|                                     |                       | beta              | p-Value         | beta              | p-Value         | beta              | p-Value         |
| Gender                              | Male                  | -.088             | .906            | -.315             | .693            | .179              | .822            |
| Relationship with patient           | Partner/child         | -.001             | .999            | .090              | .992            | .270              | .769            |
| Employment                          | Retired/other         | -.548             | .620            | -.1.29            | .276            | -2.22             | <b>.072</b>     |
| Support apart from study            | Unknown               | -.002             | .999            | .175              | .933            | -2.60             | .246            |
|                                     | Support               | -.491             | .606            | -.388             | .698            | -.569             | .594            |
| Group                               | sEBT intervention     | -.095             | .890            | .063              | .932            | .682              | .385            |
| Time of investigation               | t3                    | -.467             | .237            | -.310             | .461            | -.267             | .553            |
|                                     | t4                    | -.586             | .495            | -.342             | .710            | -.218             | .820            |
| <b>Patient's time of death</b>      | Unknown               | -1.45             | .341            | -.989             | .546            | -.958             | .550            |
|                                     | Alive                 | -1.37             | <b>.015</b>     | -1.04             | <b>.081</b>     | -1.38             | <b>.032</b>     |
|                                     | Deceased >3 months    | .960              | .259            | .719              | .430            | .908              | .326            |
| Age                                 |                       | .012              | .769            | .034              | .428            | .038              | .389            |
| Psychologist                        | Psychologist 1        | .379              | .714            | .407              | .702            | 1.00              | .352            |
|                                     | Psychologist 2        | -.106             | .912            | -.082             | .935            | -.521             | .615            |
| Missing data                        | No missing data       | .658              | .401            | .707              | .398            | .581              | .483            |
| <b>Satisfaction with life at t1</b> |                       | .644              | <b>&lt;.001</b> | .662              | <b>&lt;.001</b> | .609              | <b>&lt;.001</b> |

Table 21. **Sensitivity analyses regarding missing data:** Estimated regression coefficients beta and p-values for the independent variables in general linear mixed models with the secondary outcome variable post-treatment **satisfaction with life**. Main model: participants of at least the first two investigations (model 1); both sensitivity analyses include participants of at least the first two investigations, model 2 without participants (sEBT and control group) with only one session, model 3 without participants of the sEBT group who did not practise.

<sup>a</sup> Variables are in bold or bold italics depending on the significance of the F-test for the whole variable. Bold: significant at p-value<0.05. Bold italics: p-value between 0.05 and 0.10 (trend).

<sup>b</sup> Reference categories: Gender – Female; Relationship with Patient – Other; Employment – Employment/Student; Support apart from study – No support; Group – Control; Time of investigation – t2; Patient deceased – Deceased ≤ 3 months; Psychologist – Psychologist 3; Missing data – Missing data in outcome scales.

| Variable <sup>a</sup>                                    | Category <sup>b</sup> | Model 1<br>n= 126 |                 | Model 2<br>n= 114 |                 | Model 3<br>n= 104 |                 |
|----------------------------------------------------------|-----------------------|-------------------|-----------------|-------------------|-----------------|-------------------|-----------------|
|                                                          |                       | beta              | p-Value         | beta              | p-Value         | beta              | p-Value         |
| Gender                                                   | Male                  | -4.09             | .103            | -5.75             | <b>.029</b>     | -3.93             | .159            |
| Relationship with patient                                | Partner/child         | -1.55             | .593            | -1.29             | .668            | -1.99             | .538            |
| Employment                                               | Retired/other         | 1.81              | .632            | .186              | .962            | 1.12              | .798            |
| Support apart from study                                 | Unknown               | -4.76             | .510            | -6.26             | .375            | -8.50             | .289            |
|                                                          | Support               | -.930             | .775            | -1.28             | .699            | -2.82             | .454            |
| Group                                                    | sEBT intervention     | -2.20             | .354            | -1.12             | .650            | -3.17             | .262            |
| Time of investigation                                    | t3                    | .830              | .667            | 1.26              | .509            | 2.13              | .298            |
|                                                          | t4                    | -.852             | .853            | -.151             | .974            | -.528             | .913            |
| Patient's time of death                                  | Unknown               | -1.10             | .836            | -.854             | .876            | -.303             | .958            |
|                                                          | Alive                 | .168              | .947            | 1.35              | .592            | .593              | .827            |
|                                                          | Deceased >3 months    | 4.81              | .309            | 5.50              | .249            | 5.98              | .219            |
| Age                                                      |                       | -.143             | .322            | -.129             | .372            | -.136             | .400            |
| Psychologist                                             | Psychologist 1        | -1.63             | .646            | -2.79             | .432            | -.999             | .794            |
|                                                          | Psychologist 2        | -2.99             | .372            | -3.12             | .356            | -1.92             | .607            |
| Missing data                                             | No missing data       | -.701             | .792            | -1.27             | .645            | -1.38             | .637            |
| <b>Quality of life (World Health Organisation) at t1</b> |                       | .452              | <b>&lt;.001</b> | .519              | <b>&lt;.001</b> | .471              | <b>&lt;.001</b> |

Table 22. **Sensitivity analyses regarding missing data:** Estimated regression coefficients beta and p-values for the independent variables in general linear mixed models with the secondary outcome variable post-treatment **quality of life (World Health Organisation)**. Main model: participants of at least the first two investigations (model 1); both sensitivity analyses include participants of at least the first two investigations, model 2 without participants (sEBT and control group) with only one session, model 3 without participants of the sEBT group who did not practise.

<sup>a</sup> Variables are in bold or bold italics depending on the significance of the F-test for the whole variable. Bold: significant at p-value<0.05. Bold italics: p-value between 0.05 and 0.10 (trend).

<sup>b</sup> Reference categories: Gender – Female; Relationship with Patient – Other; Employment – Employment/Student; Support apart from study – No support; Group – Control; Time of investigation – t2; Patient deceased – Deceased ≤ 3 months; Psychologist – Psychologist 3; Missing data – Missing data in outcome scales.

| Variable <sup>a</sup>                                 | Category <sup>b</sup> | Model 1<br>n= 123 |             | Model 2<br>n= 111 |             | Model 3<br>n= 102 |             |
|-------------------------------------------------------|-----------------------|-------------------|-------------|-------------------|-------------|-------------------|-------------|
|                                                       |                       | beta              | p-Value     | beta              | p-Value     | beta              | p-Value     |
| Gender                                                | Male                  | -.421             | .181        | -.660             | <b>.051</b> | -.412             | .249        |
| <b>Relationship with pat.</b>                         | Partner/child         | -.558             | .123        | -.735             | <b>.057</b> | -.360             | .377        |
| Employment                                            | Retired/other         | -.569             | .224        | -.850             | <b>.088</b> | -.880             | .109        |
| Support apart from study                              | Unknown               | -1.32             | .134        | -1.27             | .151        | -1.90             | <b>.054</b> |
|                                                       | Support               | .107              | .790        | .272              | .518        | .101              | .839        |
| Group                                                 | sEBT intervention     | .008              | .977        | .163              | .603        | .226              | .517        |
| <b>Time of investigation</b>                          | t3                    | .448              | <b>.028</b> | .424              | <b>.052</b> | .477              | <b>.044</b> |
|                                                       | t4                    | .592              | .134        | .816              | <b>.053</b> | .768              | <b>.090</b> |
| Patient's time of death                               | Unknown               | .493              | .453        | .377              | .588        | .382              | .593        |
|                                                       | Alive                 | -.37              | .894        | -.140             | .638        | .065              | .842        |
|                                                       | Deceased >3 months    | .836              | <b>.036</b> | .533              | .203        | .784              | <b>.078</b> |
| Age                                                   |                       | .014              | .405        | .024              | .177        | .017              | .363        |
| Psychologist                                          | Psychologist 1        | .052              | .906        | .205              | .646        | -.006             | .991        |
|                                                       | Psychologist 2        | -.093             | .821        | -.050             | .908        | -.382             | .414        |
| Missing data                                          | No missing data       | .354              | .290        | .203              | .507        | .290              | .436        |
| <b>Quality of Life (numerical rating scale) at t1</b> |                       | .215              | <b>.003</b> | .195              | <b>.010</b> | .178              | <b>.033</b> |

Table 23: **Sensitivity analyses regarding missing data:** Estimated regression coefficients beta and p-values for the independent variables in general linear mixed models with the secondary outcome variable post-treatment **quality of life (numerical rating scale)**. Main model: participants of at least the first two investigations (model 1); both sensitivity analyses include participants of at least the first two investigations, model 2 without participants (sEBT and control group) with only one session, model 3 without participants of the sEBT group who did not practise.

<sup>a</sup> Variables are in bold or bold italics depending on the significance of the F-test for the whole variable. Bold: significant at p-value<0.05. Bold italics: p-value between 0.05 and 0.10 (trend).

<sup>b</sup> Reference categories: Gender – Female; Relationship with Patient – Other; Employment – Employment/Student; Support apart from study – No support; Group – Control; Time of investigation – t2; Patient deceased – Deceased ≤ 3 months; Psychologist – Psychologist 3; Missing data – Missing data in outcome scales.

| Variable <sup>a</sup>            | Category <sup>b</sup> | Model 1<br>n= 126 |                 | Model 2<br>n= 114 |                 | Model 3<br>n= 104 |                 |
|----------------------------------|-----------------------|-------------------|-----------------|-------------------|-----------------|-------------------|-----------------|
|                                  |                       | beta              | p-Value         | beta              | p-Value         | beta              | p-Value         |
| Gender                           | Male                  | -.260             | .460            | -.161             | .658            | -.260             | .514            |
| Relationship with patient        | Partner/child         | .347              | .391            | .518              | .212            | .195              | .673            |
| Employment                       | Retired/other         | .593              | .274            | .249              | .655            | .643              | .304            |
| Support apart from study         | Unknown               | .571              | .566            | .346              | .722            | .428              | .703            |
|                                  | Support               | -.097             | .834            | -.134             | .774            | -.148             | .781            |
| Group                            | sEBT intervention     | -.023             | .946            | .036              | .917            | -.063             | .874            |
| Time of investigation            | t3                    | .045              | .862            | .000              | 1.00            | .105              | .713            |
|                                  | t4                    | .717              | .178            | .532              | .341            | .520              | .370            |
| Patient's time of death          | Unknown               | .206              | .783            | .354              | .648            | .105              | .530            |
|                                  | Alive                 | -.283             | .386            | -.456             | .189            | -.273             | .453            |
|                                  | Deceased >3 months    | -.878             | .104            | -.844             | .136            | -.789             | .172            |
| Age                              |                       | -.011             | .593            | -.015             | .442            | -.002             | .994            |
| Psychologist                     | Psychologist 1        | -.710             | .160            | -.756             | .132            | -.775             | .180            |
|                                  | Psychologist 2        | -.150             | .751            | -.200             | .674            | -.001             | .999            |
| Missing data                     | No missing data       | -.346             | .366            | -.580             | .144            | -.299             | .483            |
| <b>Physical impairment at t1</b> |                       | .524              | <b>&lt;.001</b> | .557              | <b>&lt;.001</b> | .525              | <b>&lt;.001</b> |

Table 24. **Sensitivity analyses regarding missing data:** Estimated regression coefficients beta and p-values for the independent variables in general linear mixed models with the secondary outcome variable post-treatment **physical impairment**. Main model: participants of at least the first two investigations (model 1); both sensitivity analyses include participants of at least the first two investigations, model 2 without participants (sEBT and control group) with only one session, model 3 without participants of the sEBT group who did not practise.

<sup>a</sup> Variables are in bold or bold italics depending on the significance of the F-test for the whole variable. Bold: significant at p-value<0.05. Bold italics: p-value between 0.05 and 0.10 (trend).

<sup>b</sup> Reference categories: Gender – Female; Relationship with Patient – Other; Employment – Employment/Student; Support apart from study – No support; Group – Control; Time of investigation – t2; Patient deceased – Deceased ≤ 3 months; Psychologist – Psychologist 3; Missing data – Missing data in outcome scales.

| Variable <sup>a</sup>                 | Category <sup>b</sup> | Model 1<br>n= 126 |                 | Model 2<br>n= 114 |                 | Model 3<br>n= 104 |                 |
|---------------------------------------|-----------------------|-------------------|-----------------|-------------------|-----------------|-------------------|-----------------|
|                                       |                       | beta              | p-Value         | beta              | p-Value         | beta              | p-Value         |
| <b>Gender</b>                         | Male                  | -.630             | <b>.081</b>     | -.384             | .312            | -.481             | .240            |
| Relationship with patient             | Partner/child         | .197              | .635            | .280              | .522            | -.001             | .998            |
| Employment                            | Retired/other         | .400              | .460            | .543              | .342            | .955              | .133            |
| Support apart from study              | Unknown               | .435              | .666            | .303              | .763            | 1.27              | .266            |
|                                       | Support               | .255              | .586            | .080              | .869            | .158              | .733            |
| <b>Group</b>                          | sEBT intervention     | -.881             | <b>.033</b>     | -.924             | <b>.031</b>     | -.903             | .063            |
| <b>Time of investigation</b>          | t3                    | 2.14              | .148            | 2.20              | .172            | 2.09              | .196            |
|                                       | t4                    | -1.77             | <b>.004</b>     | -2.14             | <b>.001</b>     | -2.12             | <b>.002</b>     |
| <b>Time of investigation*Group</b>    | t3 * sEBT             | -2.39             | .266            | -2.47             | .296            | -2.30             | .386            |
|                                       | t4 * sEBT             | 1.15              | <b>.024</b>     | .954              | <b>.070</b>     | .616              | .283            |
| <b>Patient's time of death</b>        | Unknown               | 1.61              | <b>.044</b>     | 1.53              | <b>.072</b>     | 1.53              | <b>.081</b>     |
|                                       | Alive                 | .584              | .142            | .454              | .268            | .488              | .272            |
|                                       | Deceased >3 months    | -.414             | .507            | -.096             | .886            | -.040             | .954            |
| Age                                   |                       | -.011             | .578            | -.023             | .254            | -.029             | .188            |
| Psychologist                          | Psychologist 1        | -.396             | .441            | -.466             | .373            | -.469             | .411            |
|                                       | Psychologist 2        | .327              | .494            | .295              | .550            | .702              | .197            |
| Missing data                          | No missing data       | -.626             | .106            | -.697             | <b>.090</b>     | -.750             | <b>.081</b>     |
| <b>Psychological impairment at t1</b> |                       | .454              | <b>&lt;.001</b> | .456              | <b>&lt;.001</b> | .430              | <b>&lt;.001</b> |

Table 25. **Sensitivity analyses regarding missing data:** Estimated regression coefficients beta and p-values for the independent variables in general linear mixed models with the secondary outcome variable post-treatment **psychological impairment**. Main model: participants of at least the first two investigations (model 1); both sensitivity analyses include participants of at least the first two investigations, model 2 without participants (sEBT and control group) with only one session, model 3 without participants of the sEBT group who did not practise.

<sup>a</sup> Variables are in bold or bold italics depending on the significance of the F-test for the whole variable. Bold: significant at p-value<0.05. Bold italics: p-value between 0.05 and 0.10 (trend).

<sup>b</sup> Reference categories: Gender – Female; Relationship with Patient – Other; Employment – Employment/Student; Support apart from study – No support; Group – Control; Time of investigation – t2; Time of investigation\*Group – t2\*sEBT, t2\*Control, t3\*Control, t4\*Control; Patient deceased – Deceased ≤ 3 months; Psychologist – Psychologist 3; Missing data – Missing data in outcome scales.
